# Supplementary material for: Dialkyl Carbamoyl Chloride–Coated Dressing Prevents Macrophage and Fibroblast Stimulation via Control of Bacterial Growth: An In Vitro Assay
Source: MDPI journal article supplement (doi:10.3390/microorganisms10091825), 2022-09-13
Supplement: s1 [file s1]

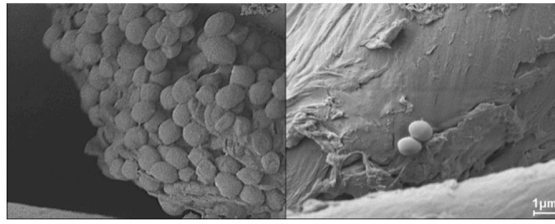

**Figure S1.** SEM high-magnification photomicrographs. Photomicrographs acquired by SEM of the DACC-coated dressing (left panel) and gauze (right panel) cultured with *S. aureus* in supplemented DMEM. Bacterial cells with the typical size and cocci morphology according to *S. aureus*. In the left panel, cocci are on and embedded in their extracellular matrix.

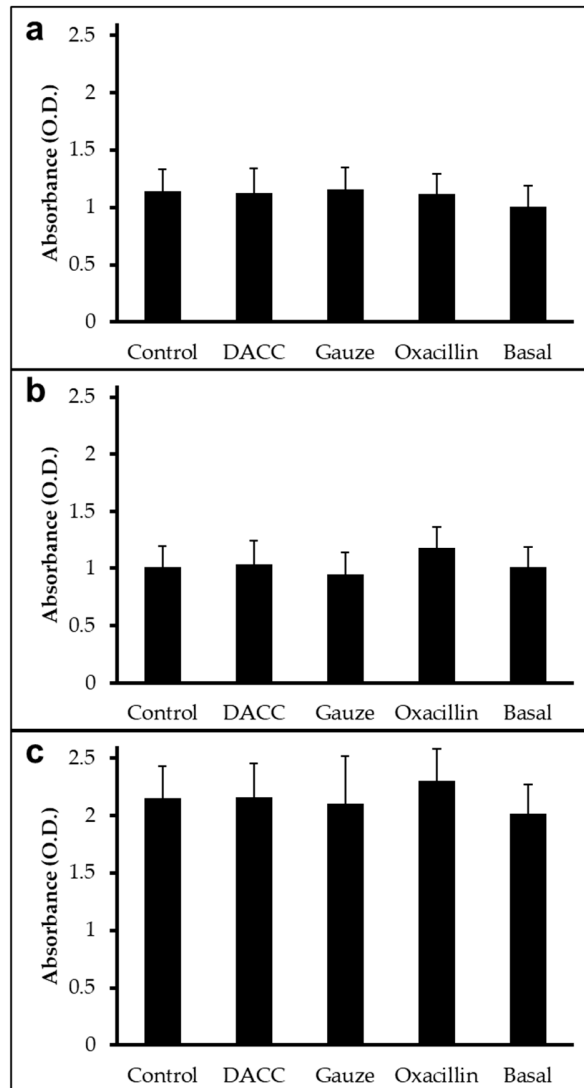

**Figure S2.** Cell viability assay in fibroblast and macrophage cultures. MTT reduction was evaluated in cultures of fibroblasts (a), macrophages (b), and co-cultures of fibroblasts and macrophages (c) after treatment with the filtered supernatants of *S. aureus* cultured in supplemented DMEM and treated with DACC and gauze dressings. Values are presented as means  $\pm$  standard deviations. The basal term refers to the conditioned medium from non-stimulated eukaryotic cultures.
